# Supplementary material for: Potent Anticarcinoma Activity of the Humanized Anti-CD70 Antibody h1F6 Conjugated to the Tubulin Inhibitor Auristatin via an Uncleavable Linker
Source: Oxford University Press journal article supplement (doi:10.1158/1078-0432.ccr-08-0916), 2008-09-22
Supplement: 10780432ccr080916-sup-supplementary_table_s1.pdf [file 10780432ccr080916-sup-supplementary_table_s1.pdf]

**Supplemental Table 1: Summary of pharmacokinetic parameters of antibody drug conjugate after single dose administration in naïve SCID mice**

Single doses of h1F6-mcMMAF as indicated were administered intra-peritoneally to naïve SCID mice. The serum samples were collected at scheduled intervals over a period of 11 weeks to obtain composite pharmacokinetic profiles. The samples were analyzed for antibody drug conjugate concentrations by a qualified multiplex bead-capture assay using an anti-MMAF antibody. The pharmacokinetic analysis was done using non-compartmental and compartmental methods. The PK parameters for 1.5 mg/kg dose of h1F6-mcMMAF(4) group were simulated from 3.0 mg/kg data, under the assumption of linear pharmacokinetics within the specified dose range.

|                    | Dose<br>(mg/kg)    | Cmax<br>(µg/mL) | Tmax <sup>a</sup><br>(h) | AUC <sub>0-∞</sub><br>(µg*d/mL) | T <sub>1/2</sub><br>(days) | CL/F<br>(mL/d/kg) |
|--------------------|--------------------|-----------------|--------------------------|---------------------------------|----------------------------|-------------------|
| h1F6-<br>mcMMAF(4) | 3.0<br>(n=3)       | 21.6<br>(21)    | 6<br>(6 – 6)             | 216<br>(18)                     | 12.8<br>(5)                | 14.2<br>(20)      |
|                    | 1.5<br>(Simulated) | 10.8            | 6<br>(6 – 6)             | 108                             | 12.8                       | 14.2              |
| h1F6-<br>mcMMAF(8) | 1.5<br>(n=3)       | 8.3<br>(4)      | 6<br>(6 – 6)             | 77.9<br>(11)                    | 14.1<br>(14)               | 19.4<br>(11)      |

Note: The data is summarized as mean (%RSD)

<sup>a</sup> Tmax is summarized as median (range)
